# Supplementary material for: Air-stable CsPb1−xBixBr3 (0 ≤ x ≪ 1) perovskite crystals: optoelectronic and photostriction properties
Source: Royal Society of Chemistry journal article supplement (doi:10.1039/c7tc00417f), 2017-01-01
Supplement: c7tc00417f1.pdf [file c7tc00417f1.pdf]

Electronic Supplementary Information

# **Air-stable $\text{CsPb}_{1-x}\text{Bi}_x\text{Br}_3$ ( $0 \leq x \ll 1$ ) perovskite crystals:** **optoelectronic and photostriction properties**

Xiaoliang Miao, Ting Qiu, Shufang Zhang,\* He Ma, Yanqiang Hu, Fan Bai, Zhuangchun Wu\*

This file includes Figure S1-S6:

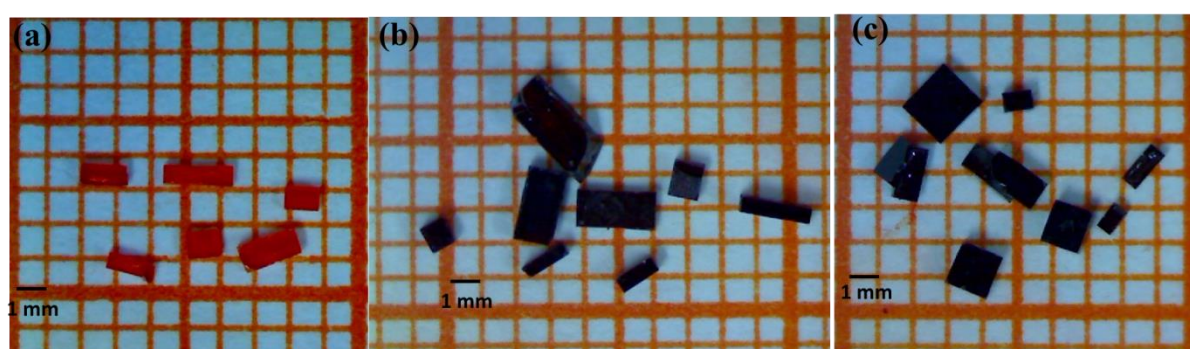

**Figure S1.** Photographs of the (a)  $\text{CsPbBr}_3$ , (b)  $\text{CsPb}_{0.975}\text{Bi}_{0.025}\text{Br}_3$ , and (c)  $\text{CsPb}_{0.9}\text{Bi}_{0.1}\text{Br}_3$  single crystals.

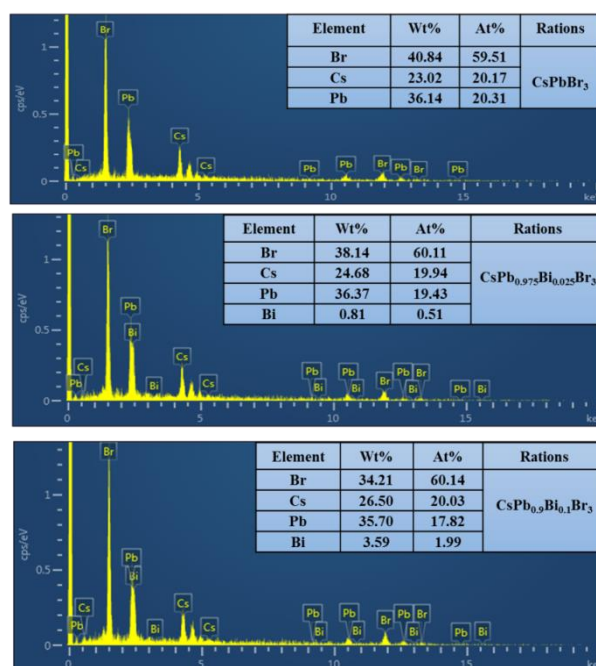

**Figure S2.** EDS results of the  $\text{CsPbBr}_3$ ,  $\text{CsPb}_{0.975}\text{Bi}_{0.025}\text{Br}_3$ , and  $\text{CsPb}_{0.9}\text{Bi}_{0.1}\text{Br}_3$  single crystals.

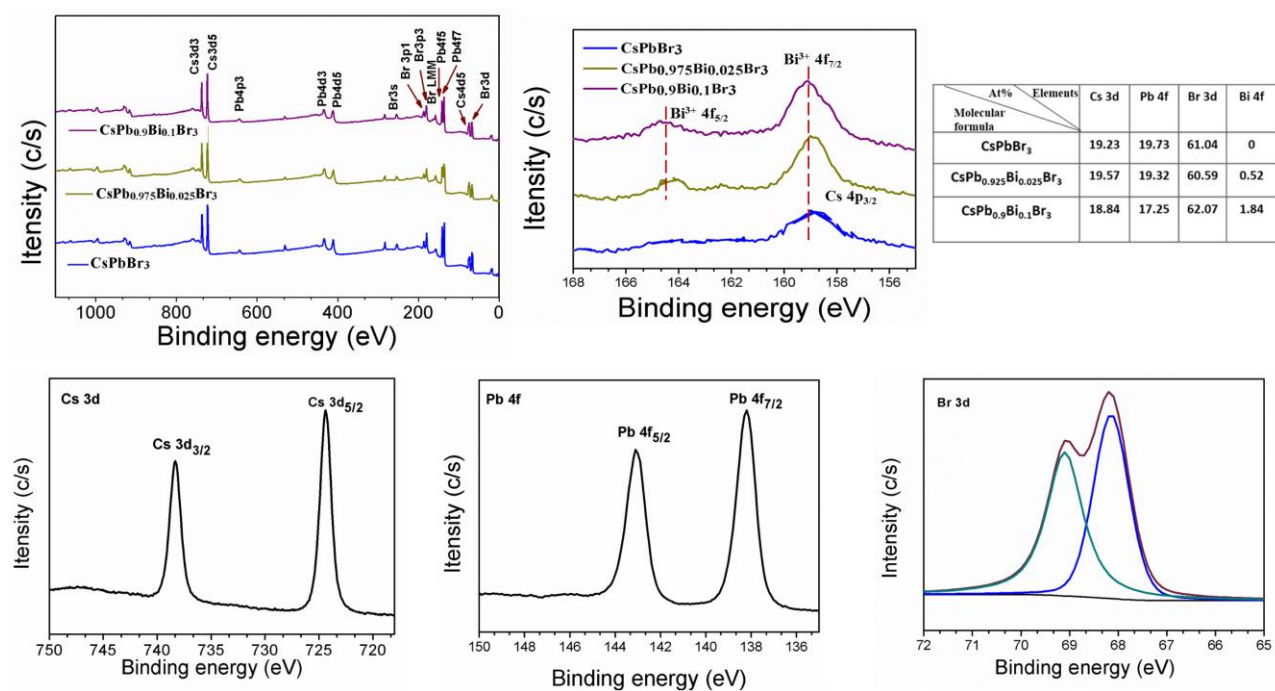

**Figure S3.** XPS spectra of CsPbBr<sub>3</sub>, CsPb<sub>0.975</sub>Bi<sub>0.025</sub>Br<sub>3</sub>, and CsPb<sub>0.9</sub>Bi<sub>0.1</sub>Br<sub>3</sub> single crystals.

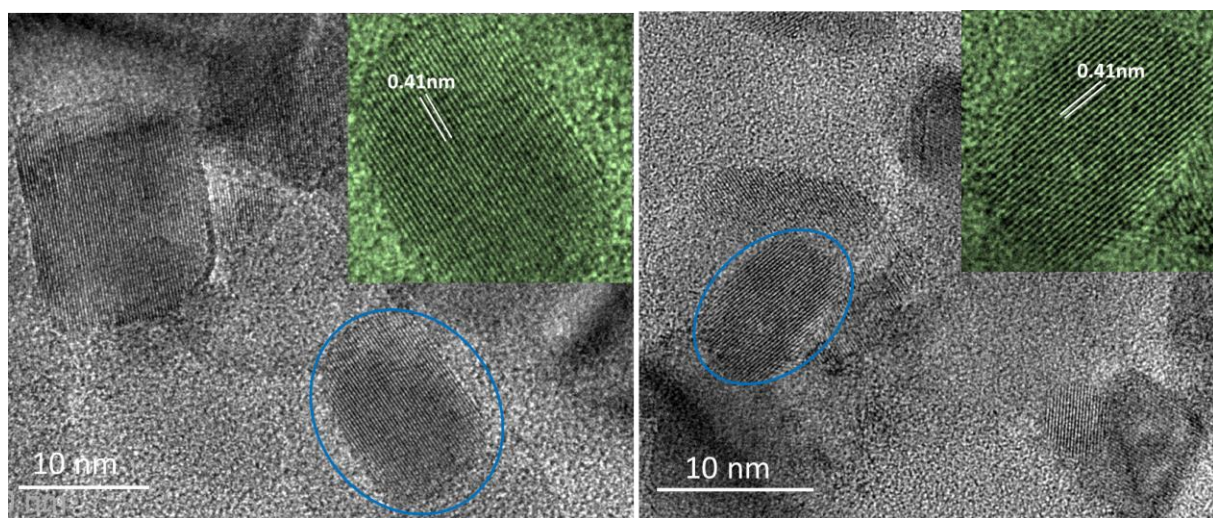

**Figure S4.** TEM images of CsPbBr<sub>3</sub>, CsPb<sub>0.975</sub>Bi<sub>0.025</sub>Br<sub>3</sub>, and CsPb<sub>0.9</sub>Bi<sub>0.1</sub>Br<sub>3</sub> thin films.

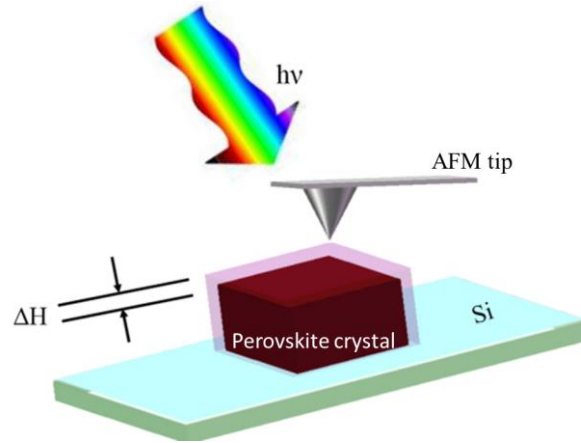

**Figure S5.** Schematic diagram of the photostriction measurement procedures.

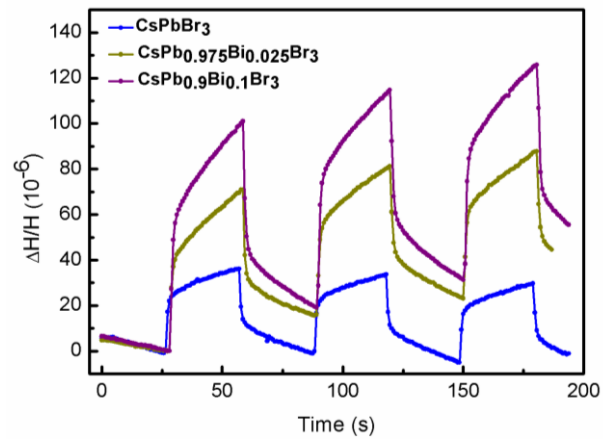

**Figure S6.** Comparison of the effective photostriction ( $\Delta H/H$ ) of CsPbBr<sub>3</sub>, CsPb<sub>0.975</sub>Bi<sub>0.025</sub>Br<sub>3</sub>, and CsPb<sub>0.9</sub>Bi<sub>0.1</sub>Br<sub>3</sub> single crystals under 1000 W/m<sup>2</sup> illumination of white light.
